# Supplementary material for: KymoButler, a deep learning software for automated kymograph analysis
Source: eLife. 2019 Aug 13;8:e42288. doi: 10.7554/eLife.42288 (PMC6692109; doi:10.7554/eLife.42288)
Supplement: Figure 2—source data 1. — A CSV file that contains: the average track F1 score, the average gap score, and the average crossing score for each unidirectional synthetic kymograph. [file elife-42288-fig2-data1.csv]

Figure 2
panel E F1 scores			panel F gap fraction			panel E F1 cross fraction
KymoButler	Manual	Fourier filter	KymoButler	Manual	Fourier filter	KymoButler	Manual	Fourier filter
0.932186801	0.928665876	0.75987142	0.926829268	0.932926829	0.715447154	0.855072464	0.927536232	0.826086957
0.894588991	0.899978634	0.521021733	0.882407407	0.880401235	0.595679012	0.859375	0.8515625	0.4375
0.924496725	0.876101902	0.653182612	0.918195719	0.856269113	0.722477064	0.93220339	0.805084746	0.593220339
0.929310539	0.908991906	0.782589075	0.807692308	0.78525641	0.748931624	0.909090909	0.872727273	0.727272727
0.931854785	0.890065434	0.523194659	0.974702381	0.897321429	0.59672619	0.934210526	0.868421053	0.342105263
0.859141101	0.885688678	0.346966164	0.864035088	0.809210526	0.434210526	0.847619048	0.847619048	0.142857143
0.944136098	0.93158571	0.585284611	0.977124183	0.980392157	0.733660131	0.972222222	1	0.597222222
0.879796858	0.838760582	0.616917507	0.880909091	0.887878788	0.822727273	0.845588235	0.852941176	0.632352941
0.960219476	0.939107074	0.77373639	0.906976744	0.924418605	0.701550388	0.964285714	0.94047619	0.666666667
0.911796444	0.86471664	0.650397244	0.875505051	0.842171717	0.765782828	0.817610063	0.811320755	0.578616352
